# Supplementary material for: Growth and feeding of deep-sea coral Lophelia pertusa from the California margin under simulated ocean acidification conditions
Source: PeerJ. 2018 Sep 27;6:e5671. doi: 10.7717/peerj.5671 (PMC6164558; doi:10.7717/peerj.5671)
Supplement: Table S2 — Each single entry corresponds to an individual fragment from the different tanks and treatment exposures. In this table, raw values for the initial Artemia density and final Artemia used to calculate the delta. Standardize values are provided as numbers of Artemia per polyp per hour [file peerj-06-5671-s002.xlsx]

## Sheet: Sheet1
	Tank	Treatment	AT	Fragment	# polyps	Artemia-i	Artemia-f	∆ artemia	Art polyp h-1
	A	pH 7.6	2300	Lophelia 1	9	101	87	14	1.55556
	A	pH 7.6	2300	Lophelia 2	13	104	97	7	0.538462
	A	pH 7.6	2300	Lophelia 3	15	105	82	23	1.53333
	A	pH 7.6	2300	Lophelia 4	4	104	76	28	7
	B	pH 7.9	2300	Lophelia 1	3	100	85	15	5
	B	pH 7.9	2300	Lophelia 2	14	105	35	70	5
	B	pH 7.9	2300	Lophelia 3	15	102	75	27	1.8
	B	pH 7.9	2300	Lophelia 4	3	103	87	16	5.33333
	C	pH 7.6	2200	Lophelia 1	10	101	80	21	2.1
	C	pH 7.6	2200	Lophelia 2	4	104	47	57	14.25
	C	pH 7.6	2200	Lophelia 3	3	102	93	9	3
	C	pH 7.6	2200	Lophelia 4	14	103	67	36	2.57143
	D	pH 7.6	2200	Lophelia 1	6	104	77	27	4.5
	D	pH 7.6	2200	Lophelia 2	11	102	84	18	1.63636
	D	pH 7.6	2200	Lophelia 3	18	103	56	47	2.61111
	D	pH 7.6	2200	Lophelia 4	9	102	100	2	0.222222
	E	pH 7.6	2300	Lophelia 1	10	100	63	37	3.7
	E	pH 7.6	2300	Lophelia 2	14	106	71	35	2.5
	E	pH 7.6	2300	Lophelia 3	10	104	87	17	1.7
	E	pH 7.6	2300	Lophelia 4	17	103	58	45	2.64706
	F	pH 7.9	2300	Lophelia 1	16	101	43	58	3.625
	F	pH 7.9	2300	Lophelia 2	11	103	75	28	2.54545
	F	pH 7.9	2300	Lophelia 3	7	102	76	26	3.71429
	F	pH 7.9	2300	Lophelia 4	8	103	57	46	5.75
